# Supplementary material for: Drug Overdose Mortality Among People Experiencing Homelessness, 2003 to 2018
Source: PubMed Central journal article supplement (PMC8742197; doi:10.1001/jamanetworkopen.2021.42676), 2022-01-07
Supplement: jamanetwopen-e2142676-s001.pdf [file jamanetwopen-e2142676-s001.pdf]

## Supplementary Online Content

Fine DR, Dickins KA, Adams LD, et al. Drug overdose mortality among people experiencing homelessness, 2003 to 2018. *JAMA Netw Open*. 2022;5(1):e2142676. doi:10.1001/jamanetworkopen.2021.42676

**eTable 1.** ICD-10 Codes Defining Drug Overdose and the Types of Drugs Implicated in Deaths

**eTable 2.** Polysubstance Drug Overdose Mortality by Drug Categories Involved in Death in the Boston Health Care for the Homeless Cohort From 2004 to 2018

**eFigure 1.** Drug Overdose Mortality in the Boston Health Care for the Homeless Cohort, Stratified by Race and Ethnicity

**eFigure 2.** Crude Drug Overdose Mortality in the Boston Health Care for the Homeless Cohort From 2004 to 2018, Stratified by Race and Ethnicity

**eTable 3.** Opioid-Involved Overdose Mortality by Race and Ethnicity in the Boston Health Care for the Homeless Cohort

**eFigure 3.** Drug Overdose Mortality in a Cohort of Homeless-Experienced Adults, Stratified by Sex

**eFigure 4.** Crude Drug Overdose Mortality in the Boston Health Care for the Homeless Cohort From 2004 to 2018, Stratified by Sex

**eTable 4.** Opioid-Involved Overdose Mortality by Sex in the Boston Health Care for the Homeless Cohort

This supplementary material has been provided by the authors to give readers additional information about their work.

**eTable 1.** ICD-10 Codes Defining Drug Overdose and the Types of Drugs Implicated in Deaths

| Category                                  | ICD-10 Code  |
|-------------------------------------------|--------------|
| Drug Overdose                             |              |
| Accidental                                | X40-X44      |
| Intentional                               | X60-X64      |
| Assault                                   | X85          |
| Undetermined intent                       | Y10-Y14      |
| Opioids                                   |              |
| Heroin                                    | T40.1        |
| Commonly prescribed opioids and methadone | T40.2, T40.3 |
| Synthetics                                | T40.4        |
| Other and unspecific narcotics            | T40.6        |
| Cocaine                                   | T40.5        |
| Psychostimulants with misuse potential    | T43.6        |
| Benzodiazepines                           | T42.4        |
| Other                                     |              |
| Antidepressants                           | T43.0-43.2   |
| Antipsychotics                            | T43.3-43.5   |
| Barbiturates                              | T42.3        |
| Other neuroleptics and sedatives          | T42.5-T42.7  |

**eTable 2. Polysubstance Drug Overdose Mortality by Drug Categories Involved in Death in the Boston Health Care for the Homeless Cohort From 2004 to 2018**

| Year  | Polysubstance-involved |                                     | Opioid-involved <sup>a</sup> |                                     | Cocaine-involved <sup>a</sup> |                                     | Benzodiazepine-involved <sup>a</sup> |                                     | Psychostimulant-involved <sup>a</sup> |                                     |
|-------|------------------------|-------------------------------------|------------------------------|-------------------------------------|-------------------------------|-------------------------------------|--------------------------------------|-------------------------------------|---------------------------------------|-------------------------------------|
|       | n                      | Crude rate <sup>b</sup><br>(95% CI) | n<br>(%)                     | Crude rate <sup>b</sup><br>(95% CI) | n<br>(%)                      | Crude rate <sup>b</sup><br>(95% CI) | n<br>(%)                             | Crude rate <sup>b</sup><br>(95% CI) | n<br>(%)                              | Crude rate <sup>b</sup><br>(95% CI) |
| 2004  | 3                      | 44.0<br>(9.1, 128.5)                | 3<br>(100)                   | 44.0<br>(9.1, 128.5)                | 2<br>(67)                     | 29.3<br>(3.5, 105.9)                | 1<br>(33)                            | 14.7<br>(0.4, 81.6)                 | 0 (0)                                 | 0<br>(0, 54.0)                      |
| 2005  | 15                     | 132.1<br>(73.9, 217.9)              | 13<br>(87)                   | 114.45<br>(61.0, 195.8)             | 10<br>(67)                    | 88.1<br>(42.2, 161.9)               | 2<br>(13)                            | 17.6<br>(2.1, 63.6)                 | 0 (0)                                 | 0<br>(0, 32.5)                      |
| 2006  | 28                     | 181.4<br>(120.6, 262.4)             | 23<br>(82)                   | 149.0<br>(94.5, 223.6)              | 16<br>(57)                    | 103.7<br>(59.3, 168.4)              | 3<br>(11)                            | 19.4<br>(4.0, 56.8)                 | 0 (0)                                 | 0<br>(0, 23.9)                      |
| 2007  | 20                     | 104.8<br>(64.0, 161.9)              | 17<br>(85)                   | 89.1<br>(51.9, 142.7)               | 11<br>(55)                    | 57.7<br>(28.8, 103.2)               | 6<br>(30)                            | 31.4<br>(11.5, 68.4)                | 0 (0)                                 | 0<br>(0, 19.3)                      |
| 2008  | 32                     | 141.0<br>(96.4, 199.0)              | 27<br>(84)                   | 118.9<br>(78.4, 173.1)              | 17<br>(53)                    | 74.9<br>(43.6, 119.9)               | 5<br>(16)                            | 22.0<br>(7.2, 51.4)                 | 0 (0)                                 | 0<br>(0, 16.3)                      |
| 2009  | 18                     | 68.2<br>(40.5, 107.9)               | 16<br>(89)                   | 60.7<br>(34.7, 98.5)                | 12<br>(67)                    | 45.5<br>(23.5, 79.5)                | 4<br>(22)                            | 15.2<br>(4.1, 38.8)                 | 0 (0)                                 | 0<br>(0, 14.0)                      |
| 2010  | 29                     | 95.5<br>(63.9, 137.1)               | 29<br>(100)                  | 95.5<br>(63.9, 137.1)               | 20<br>(69)                    | 65.8<br>(40.2, 101.7)               | 11<br>(38)                           | 36.2<br>(18.1, 64.8)                | 0 (0)                                 | 0<br>(0, 12.1)                      |
| 2011  | 40                     | 116.7<br>(83.3, 158.9)              | 36<br>(90)                   | 105.0<br>(73.5, 145.4)              | 18<br>(45)                    | 52.5<br>(31.1, 83.0)                | 14<br>(35)                           | 40.8<br>(22.3, 68.5)                | 2 (5)                                 | 5.8<br>(0.7, 21.1)                  |
| 2012  | 44                     | 115.7<br>(84.1, 155.3)              | 39<br>(89)                   | 102.6<br>(72.9, 140.2)              | 23<br>(52)                    | 60.5<br>(38.3, 90.8)                | 9<br>(20)                            | 23.7<br>(10.8, 44.9)                | 2 (5)                                 | 5.3<br>(0.6, 19.0)                  |
| 2013  | 61                     | 146.6<br>(112.1, 188.3)             | 59<br>(97)                   | 141.8<br>(107.9, 182.9)             | 27<br>(44)                    | 64.9<br>(42.8, 94.4)                | 21<br>(34)                           | 50.5<br>(31.2, 77.1)                | 0 (0)                                 | 0<br>(0, 8.9)                       |
| 2014  | 89                     | 198.7<br>(159.5, 244.5)             | 88<br>(99)                   | 196.4<br>(157.5, 242.0)             | 45<br>(51)                    | 100.4<br>(73.3, 134.4)              | 31<br>(35)                           | 69.2<br>(47.0, 98.2)                | 6 (7)                                 | 13.4<br>(4.9, 29.2)                 |
| 2015  | 148                    | 312.7<br>(264.4, 367.4)             | 140<br>(95)                  | 295.8<br>(248.9, 349.1)             | 86<br>(58)                    | 181.7<br>(145.4, 224.4)             | 26<br>(18)                           | 54.9<br>(35.9, 80.5)                | 5 (3)                                 | 10.6<br>(3.4, 24.7)                 |
| 2016  | 141                    | 285.1<br>(240.0, 336.3)             | 132<br>(94)                  | 266.9<br>(223.3, 316.5)             | 81<br>(57)                    | 163.8<br>(130.1, 203.6)             | 25<br>(18)                           | 50.6<br>(32.7, 74.6)                | 3 (2)                                 | 6.1<br>(1.3, 17.7)                  |
| 2017  | 169                    | 327.9<br>(280.4, 381.3)             | 157<br>(93)                  | 304.7<br>(258.9, 356.2)             | 111<br>(67)                   | 215.4<br>(177.2, 259.4)             | 47<br>(28)                           | 91.2<br>(67.0, 121.3)               | 13<br>(8)                             | 25.2<br>(13.4, 43.1)                |
| 2018  | 149                    | 246.1<br>(208.1, 288.9)             | 144<br>(97)                  | 237.8<br>(200.6, 280.0)             | 74<br>(50)                    | 122.2<br>(96.0, 153.4)              | 67<br>(45)                           | 110.6<br>(85.8, 140.5)              | 12<br>(8)                             | 19.8<br>(10.2, 34.6)                |
| Total | 986                    | 190.3<br>(178.6, 202.5)             | 923<br>(94)                  | 178.1<br>(166.8, 190.0)             | 553<br>(56)                   | 106.8<br>(98.1, 116.1)              | 272<br>(28)                          | 52.6<br>(46.6, 59.2)                | 43<br>(4)                             | 8.3<br>(6.0, 11.2)                  |

<sup>a</sup>Denominator for drug-specific percentages = number of polysubstance-involved deaths for each corresponding year

<sup>b</sup>Per 100,000 person-years

Drug categories are not mutually exclusive

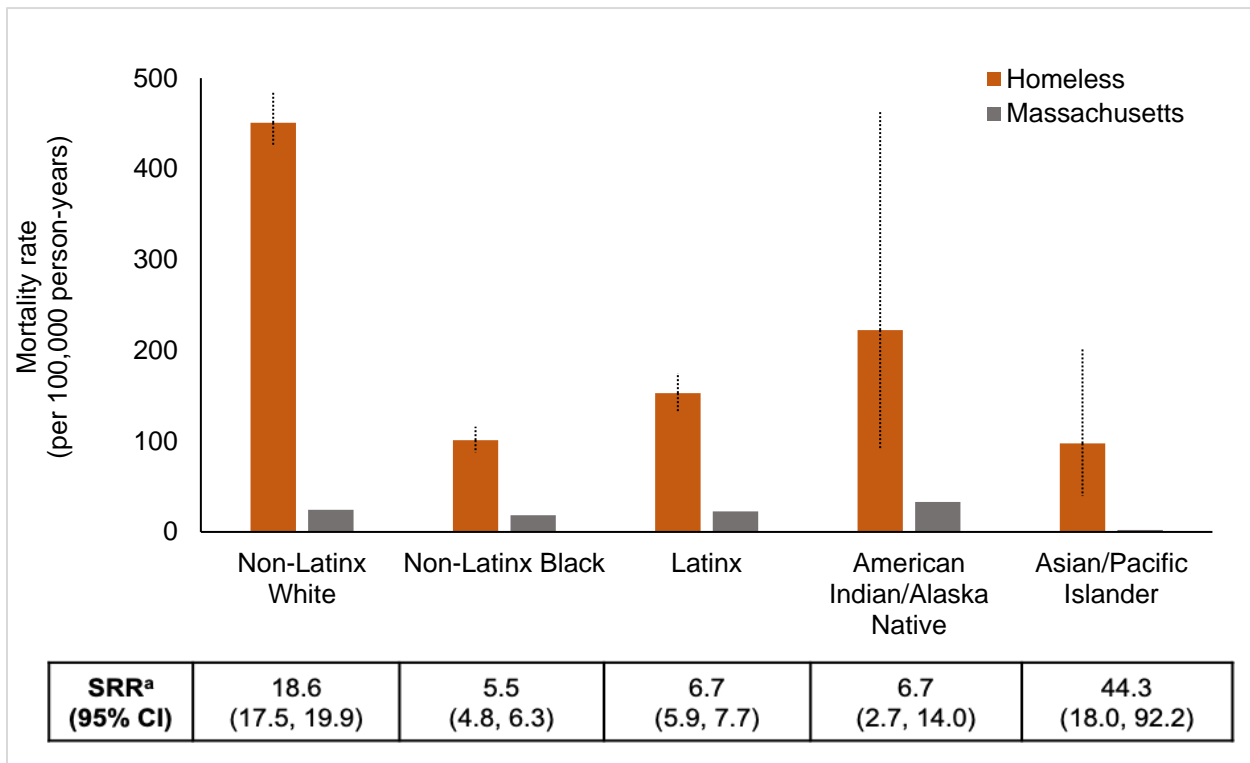

**eFigure 1.** Drug Overdose Mortality in the Boston Health Care for the Homeless Cohort, Stratified by Race and Ethnicity

White, Black, and Latinx mortality rates are age- and sex-standardized; American Indian/Alaska Native and Asian/Pacific Islander are only age-standardized due to cell suppression in CDC Wonder data.

<sup>a</sup>SRR=standardized rate ratio (calculated as standardized mortality rate in the BHCHP cohort divided by the standardized mortality rate in the general Massachusetts adult population).

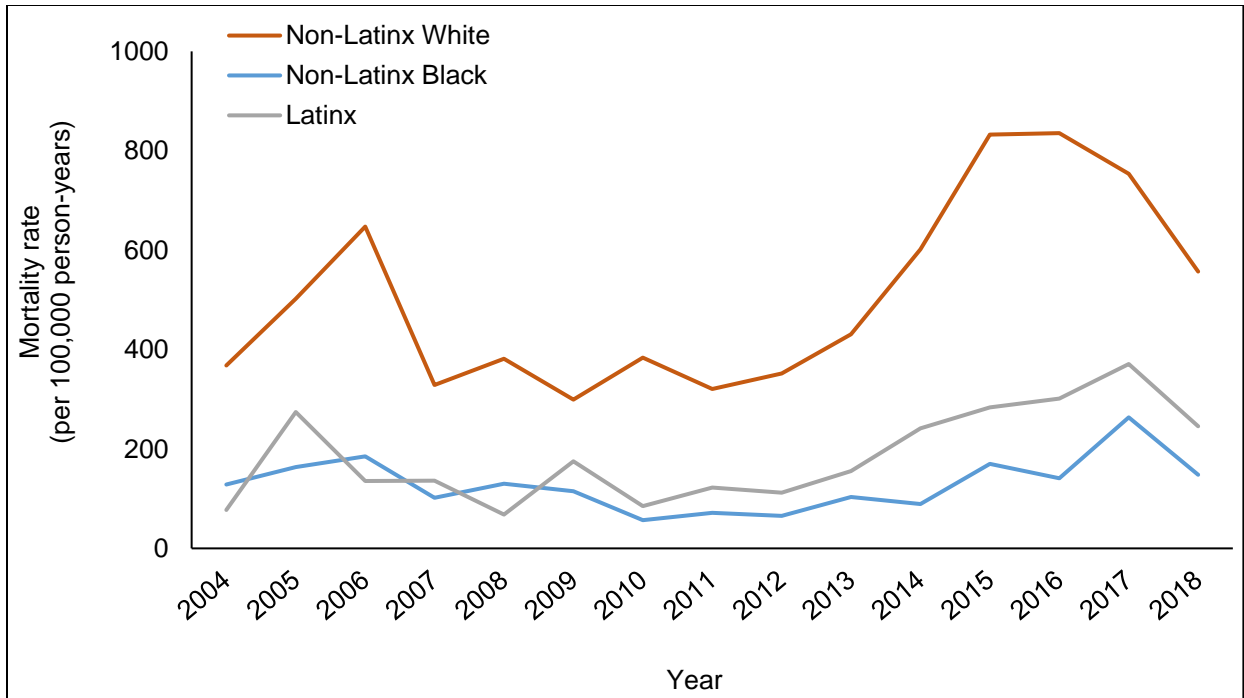

**eFigure 2.** Crude Drug Overdose Mortality in the Boston Health Care for the Homeless Cohort From 2004 to 2018, Stratified by Race and Ethnicity

**eTable 3. Opioid-Involved Overdose Mortality by Race and Ethnicity in the Boston Health Care for the Homeless Cohort**

| Drug(s) implicated           | Non-Latinx White                    |            | Non-Latinx Black                    |            | Latinx                              |            | P value <sup>b</sup> |
|------------------------------|-------------------------------------|------------|-------------------------------------|------------|-------------------------------------|------------|----------------------|
|                              | Crude Rate <sup>a</sup><br>(95% CI) | Proportion | Crude Rate <sup>a</sup><br>(95% CI) | Proportion | Crude Rate <sup>a</sup><br>(95% CI) | Proportion |                      |
| All opioid                   | 507.3<br>(477.8, 538.2)             | --         | 101.8<br>(86.1, 119.4)              | --         | 190.1<br>(163.8, 219.4)             | --         | --                   |
| Opioid alone                 | 216.6<br>(197.4, 237.1)             | 0.43       | 38.0<br>(28.7, 49.3)                | 0.37       | 71.5<br>(55.5, 89.9)                | 0.37       | 0.23                 |
| Opioid + ≥ 1 other substance | 290.7<br>(268.5, 314.3)             | 0.57       | 63.8<br>(51.5, 78.0)                | 0.63       | 118.9<br>(98.4, 142.5)              | 0.63       | --                   |
| Opioid + cocaine             | 154.4<br>(138.3, 171.8)             | 0.53       | 46.1<br>(35.8, 58.5)                | 0.72       | 74.2<br>(58.2, 93.3)                | 0.62       | <0.001               |
| Opioid + alcohol             | 94.9<br>(82.4, 108.8)               | 0.33       | 27.8<br>(20.0, 37.7)                | 0.44       | 48.8<br>(36.0, 64.7)                | 0.41       | 0.009                |
| Opioid + benzodiazepine      | 92.2<br>(78.8, 105.8)               | 0.32       | 4.7<br>(1.9, 9.8)                   | 0.07       | 23.6<br>(14.8, 35.1)                | 0.20       | <0.001               |
| Opioid + psychostimulant     | 14.7<br>(10.0, 20.8)                | 0.05       | 1.4<br>(0.2, 4.9)                   | 0.02       | 2.0 (0.2, 7.3)                      | 0.02       | 0.27                 |

<sup>a</sup>Per 100,000 person-years

<sup>b</sup>P values are based on Fisher exact tests assessing the differences in proportions

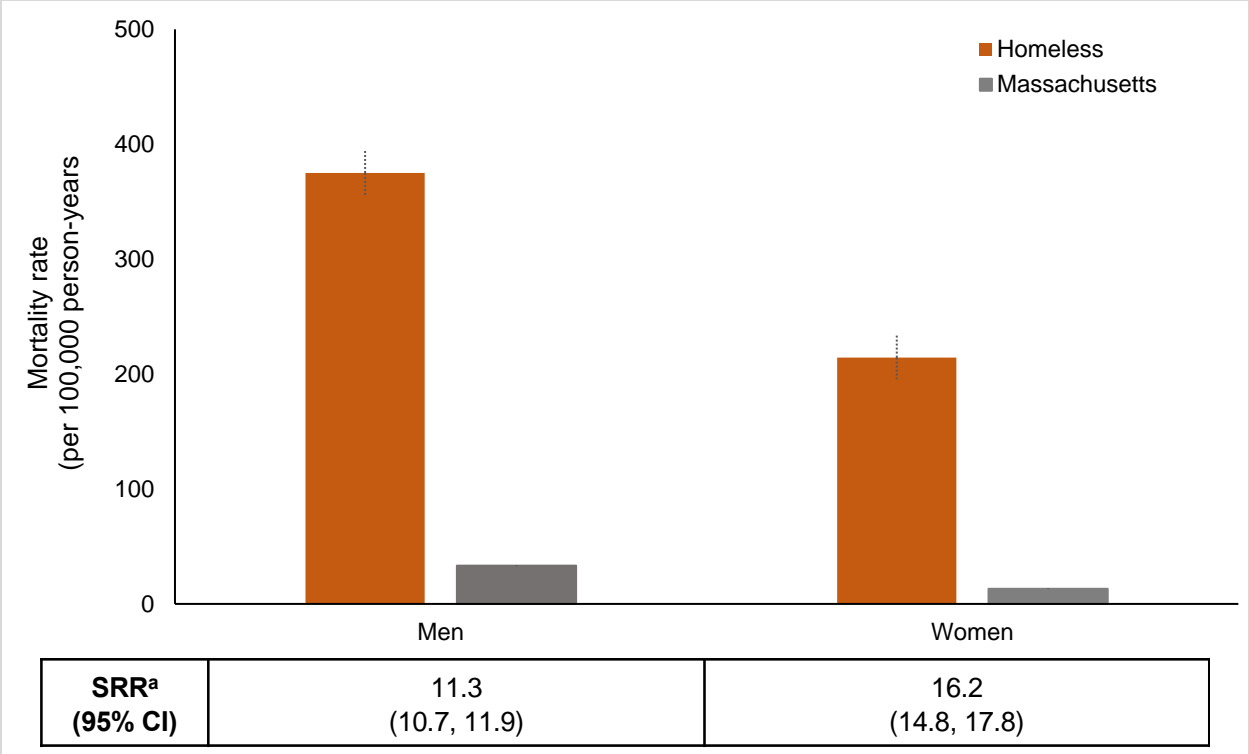

**eFigure 3.** Drug Overdose Mortality in a Cohort of Homeless-Experienced Adults, Stratified by Sex

Mortality rates are age-standardized. <sup>a</sup>SRR=standardized rate ratio (calculated as standardized mortality rate in the BHCHP cohort divided by the standardized mortality rate in the general Massachusetts adult population).

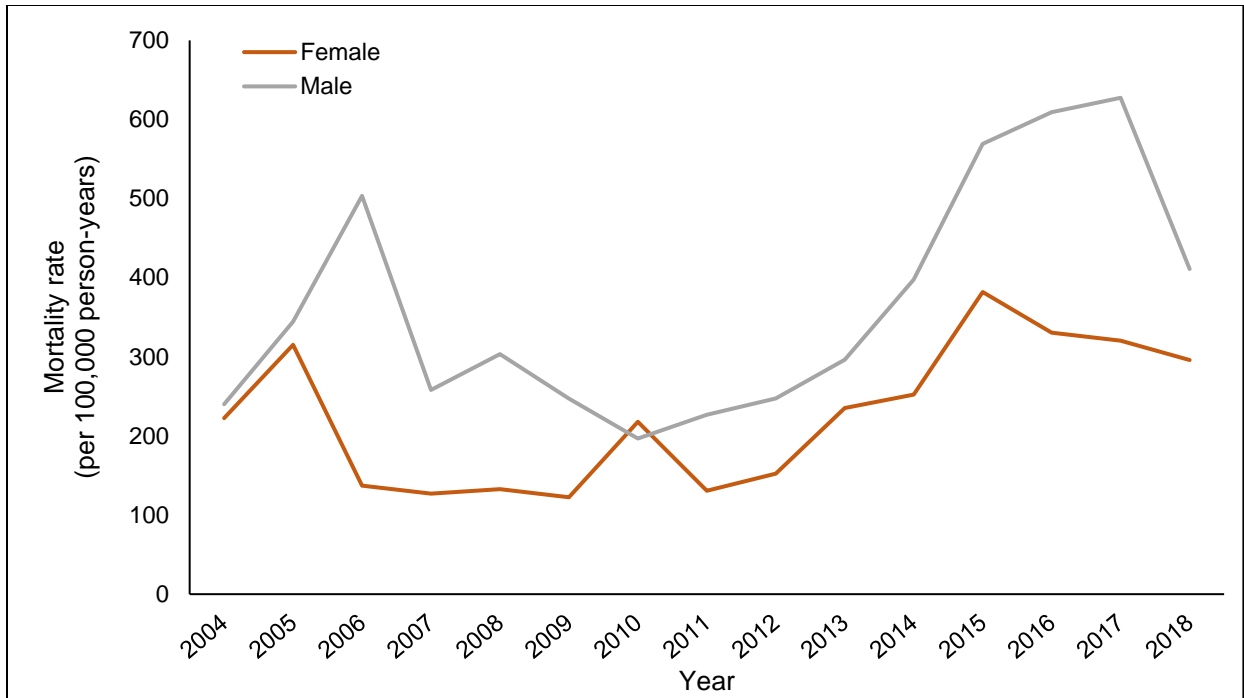

**eFigure 4.** Crude Drug Overdose Mortality in the Boston Health Care for the Homeless Cohort From 2004 to 2018, Stratified by Sex



**eTable 4. Opioid-Involved Overdose Mortality by Sex in the Boston Health Care for the Homeless Cohort**

| Drug(s) implicated           | Male                                |            | Female                              |            | P value <sup>b</sup> |
|------------------------------|-------------------------------------|------------|-------------------------------------|------------|----------------------|
|                              | Crude Rate <sup>a</sup><br>(95% CI) | Proportion | Crude Rate <sup>a</sup><br>(95% CI) | Proportion |                      |
| All opioid                   | 352.7 (332.7, 373.5)                | --         | 213.4 (193.1, 235.2)                | --         | --                   |
| Opioid alone                 | 146.1 (133.3, 159.7)                | 0.41       | 84.8 (72.2, 99.0)                   | 0.40       | 0.60                 |
| Opioid + ≥ 1 other substance | 206.6 (191.4, 222.7)                | 0.59       | 128.9 (112.9, 145.7)                | 0.60       | --                   |
| Opioid + cocaine             | 114.6 (103.4, 126.8)                | 0.55       | 77.5 (65.4, 91.0)                   | 0.60       | 0.18                 |
| Opioid + alcohol             | 77.1 (67.9, 87.2)                   | 0.37       | 31.6 (24.1, 40.7)                   | 0.25       | 0.002                |
| Opioid + benzodiazepine      | 51.4 (44.0, 59.8)                   | 0.25       | 43.2 (34.4, 53.6)                   | 0.34       | 0.009                |
| Opioid + psychostimulant     | 9.1 (6.1, 13.0)                     | 0.04       | 4.7 (2.2, 9.0)                      | 0.04       | 0.85                 |

<sup>a</sup>Per 100,000 person-years  
<sup>b</sup>P values are based on Fisher exact tests assessing the differences in proportions
